# Supplementary material for: UltraPrep is a scalable, cost-effective, bead-based method for purifying cell-free DNA
Source: PubMed Central journal article supplement (PMC7263608; doi:10.1371/journal.pone.0231854), 2020-06-01

Image used to create Fig 2

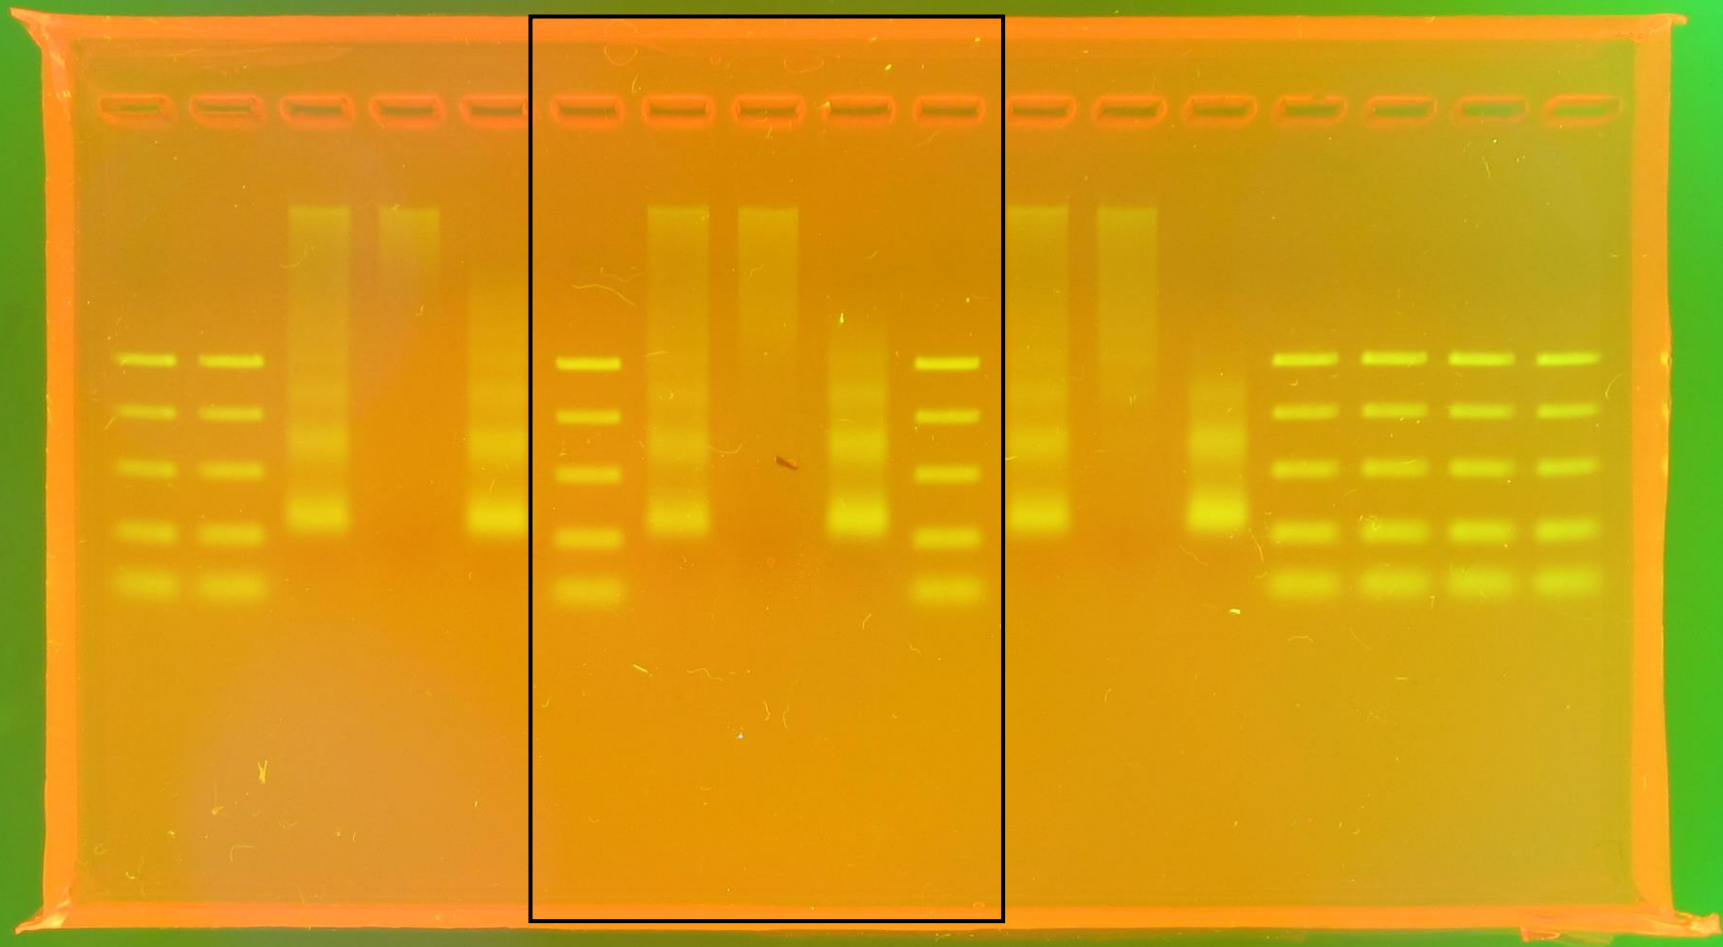

Image used to create Fig 3 and Fig 4

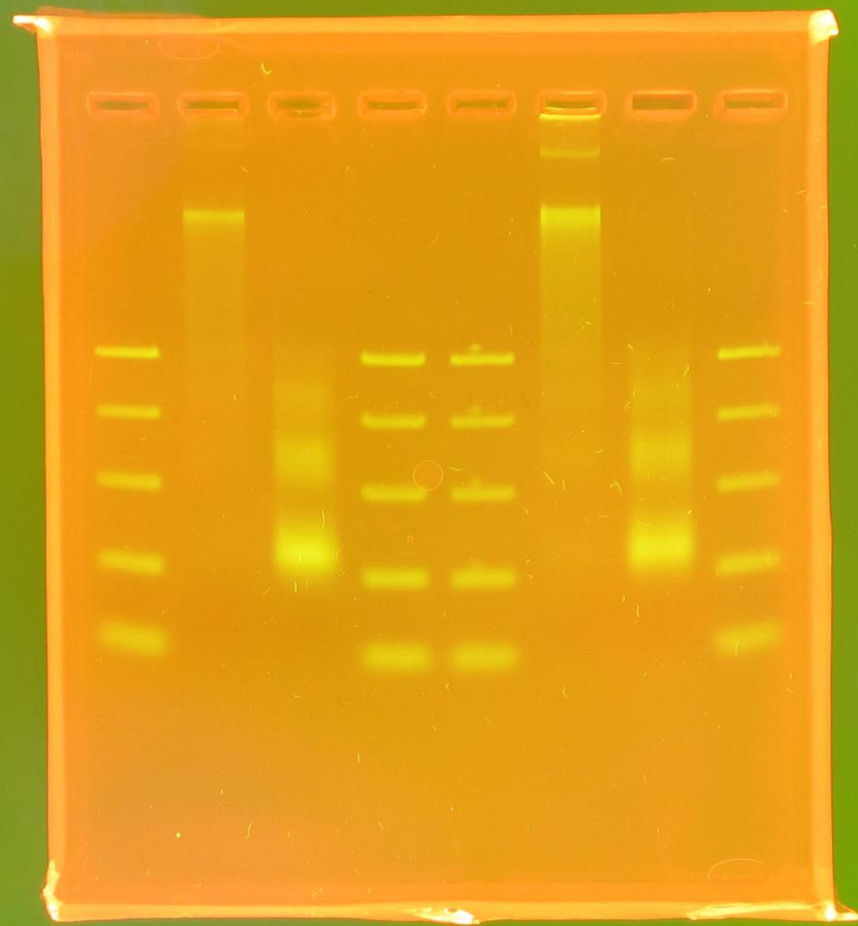

Supplement: pone.0231854.s006.pdf [file pone.0231854.s006.pdf]
